# Supplementary material for: Anti-CD3 Antibody Treatment Induces Hypoglycemia and Super Tolerance to Glucose Challenge in Mice through Enhancing Glucose Consumption by Activated Lymphocytes
Source: PubMed Central journal article supplement (PMC3987876; doi:10.1155/2014/326708), 2014-02-11
Supplement: 326708.f1.pdf [file 326708.f1.pdf]

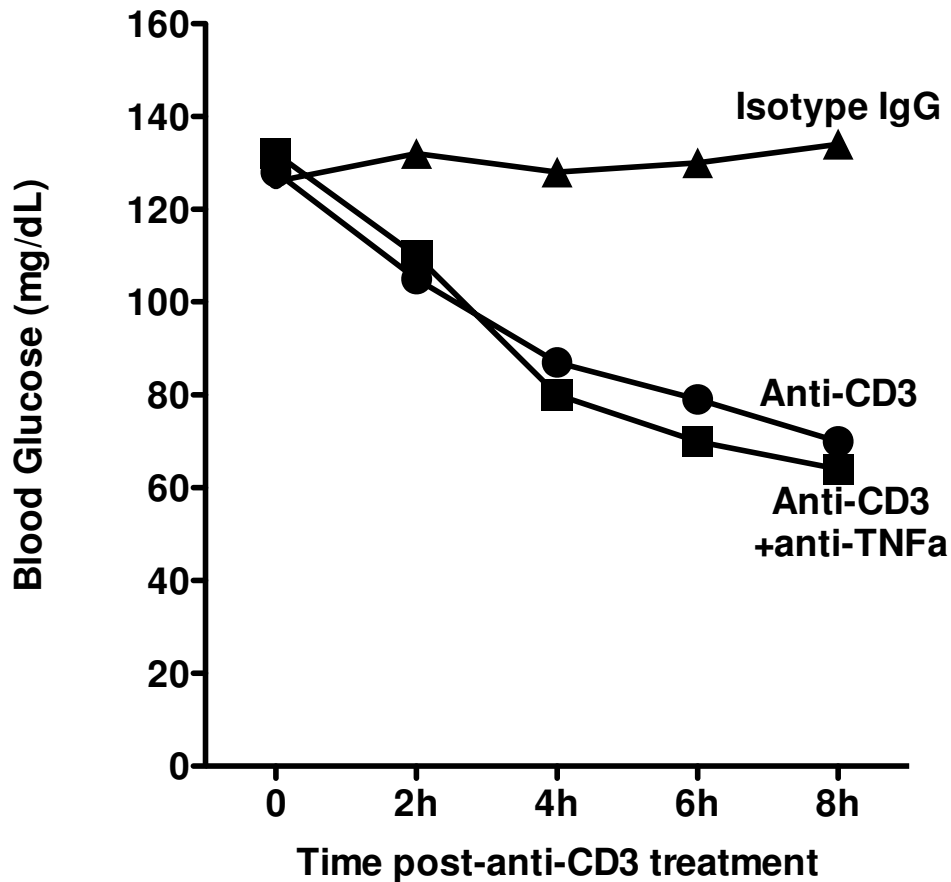

**Supplemental Figure 1. High dose of anti-TNFa failed to reverse anti-CD3 treatment induced hypoglycemia.** B6 mice were treated with intraperitoneal injection of isotype IgG (50 ug), anti-CD3 (50 ug), anti-CD3 (50 ug) plus anti-TNFa (500 ug), respectively. Blood glucose was measured every two hours for 8hrs.
